# Supplementary material for: Microbial Source Tracking Approach to Investigate Fecal Waste at the Strawberry Creek Watershed and Clam Beach, California, USA
Source: MDPI journal article supplement (doi:10.3390/ijerph18136901), 2021-06-27
Supplement: s1 [file s1]

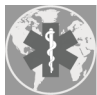

*Supplementary Material*

# Microbial Source Tracking Approach to Investigate Fecal Waste at the Strawberry Creek Watershed and Clam Beach, California, USA

Jeremy A. Corrigan <sup>1,2,\*</sup>, Steven R. Butkus <sup>3</sup>, Michael E. Ferris <sup>1</sup>, Jill C. Roberts <sup>2</sup>

<sup>1</sup> Humboldt County Public Health Laboratory, County of Humboldt, 529 I Street, Eureka, CA 95501, USA; Jeremy A. Corrigan: jcorrigan@co.humboldt.ca.us; Michael E. Ferris: micromikepetaluma@gmail.com

<sup>2</sup> College of Public Health, University of South Florida, 13201 Bruce B. Downs Blvd, MDC 56, Tampa, FL 33612, USA; jcrobert@usf.edu

<sup>3</sup> State of California, North Coast Regional Water Quality Control Board, 5550 Skyline Blvd., Santa Rosa, CA, 95403, USA; stevebutkus@yahoo.com

\* Correspondence: jcorrigan@co.humboldt.ca.us; Tel.: +1-(707)-268-2178

## METHODS

**Sample Collection.** All samples were transported and stored in coolers with ice packs and were received by the lab and processed within 6 hours of collection. A runner was used to pick up samples from the collection site in batches and drive them to the laboratory for processing and analysis.

**qPCR Conditions.** The qPCR components of each assay are described in Table S5. All assays consist of Taqman Environmental Mastermix 2.0 (Applied Biosystems, Foster City, CA), target specific primers and probes, bovine serum albumin (BSA) (Fisher Scientific, Waltham MA), and nuclease free water (Table S4). The qPCR thermocycler conditions are as follows: 2 min at 50°C, 10 min at 95°C, 40 cycles of 15 sec at 95°C, 1 min at 60°C, ROX dye is on and Ct is set to 0.08. A summary of the performance characteristics is also listed in Table S10.

**Interpretation and Analysis of qPCR.** Limits of quantification (LOQ) are based on the standard curve and defined as the lowest standard concentration that consistently amplifies within the ROQ. The lower limit of quantification is defined as the LOQ, and in all assays used in this project is determined to be 10 copies per qPCR reaction. The limit of detection (LOD) of the qPCR assays are defined as the theoretical lower limit of detection which is 1 copy per qPCR reaction and results below the LOD are characterized as non-detectable (ND). qPCR results below the LOQ (10 copies per qPCR reaction) but above the LOD (1 copy per qPCR reaction) are characterized as detected below limit of quantification (BLOQ). If both replicates failed to amplify, the result was deemed ND. If one replicate failed to amplify, the result was determined to be ND. If the mean of both replicates amplified fell below the LOD, it was determined to be ND. Copies of target sequence per 100 mLs was determined by taking the copies detected in the PCR reaction, dividing by the volume (2 or 5 ul) of purified nucleic acid eluate used in the reaction, multiplying by the total volume (100 ul) of eluate obtained in the purification of the processed lysate, dividing by 100 mL (target volume of water to be filtered), multiplying by the ratio of the *target* volume to be filtered (100 mL) to the *actual* volume of sample water filtered. In short, multiply the resulting copy number by 50 for the human, ruminant and dog assays, and multiply by 20 for the bird assay if the mean copy number is  $\geq 10$  copies per qPCR reaction.

## SUPPLEMENTAL FIGURES

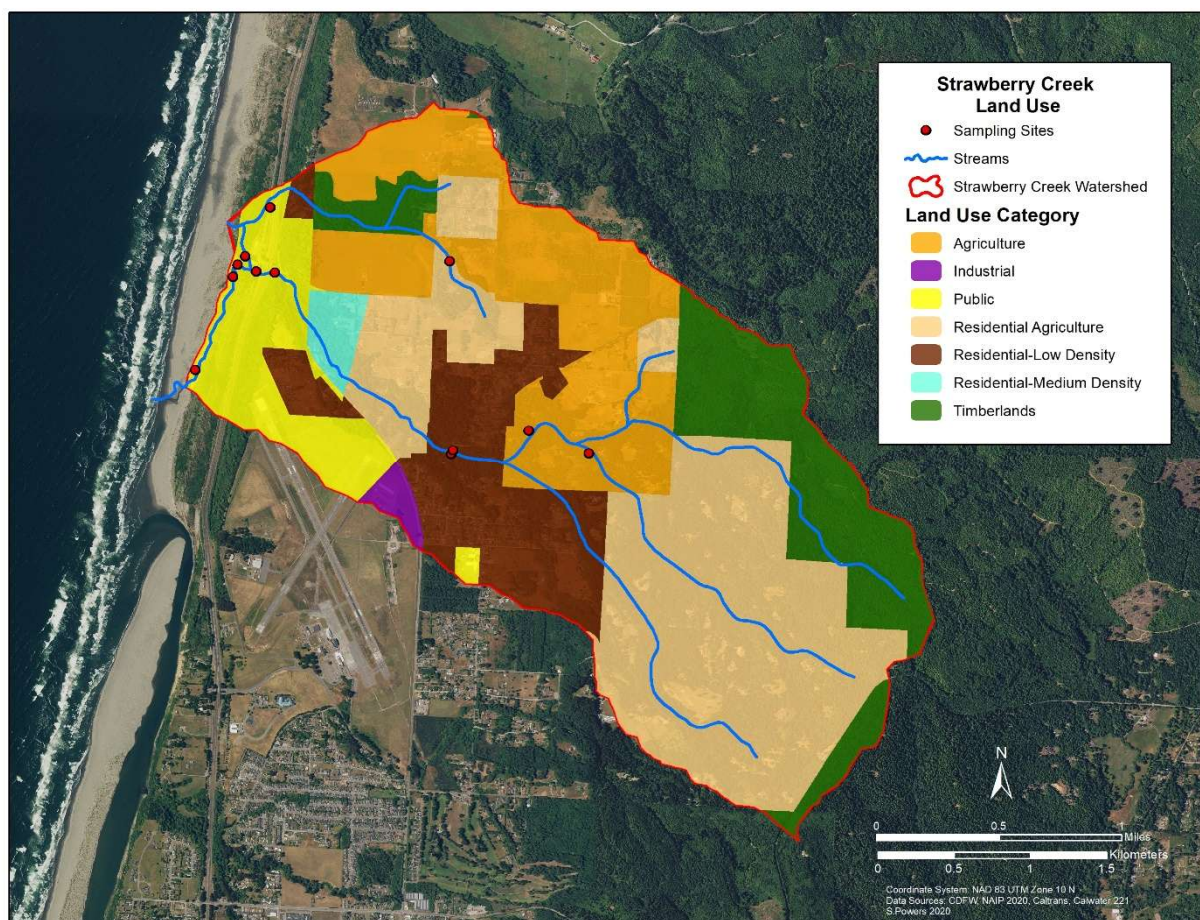

Figure S1. Primary land use by area of Strawberry Creek watershed. County of Humboldt GIS.

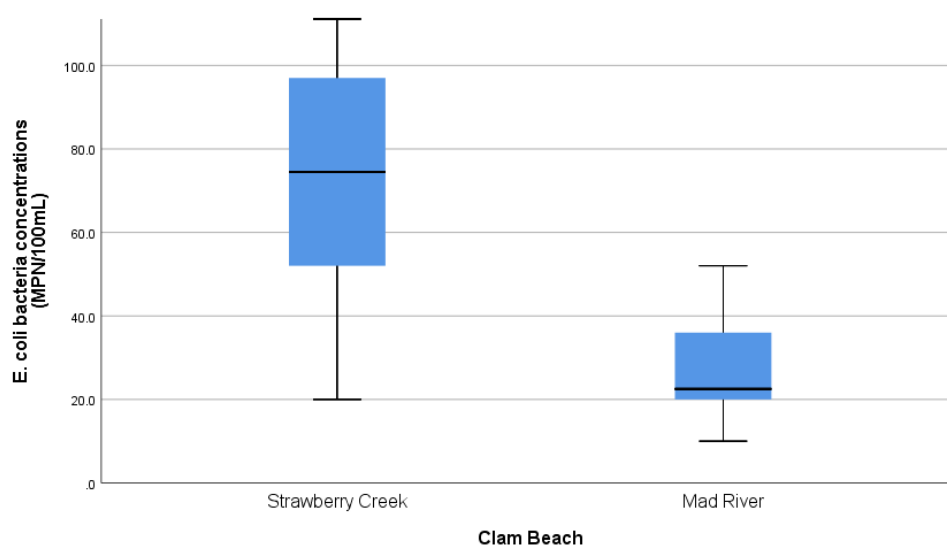

a

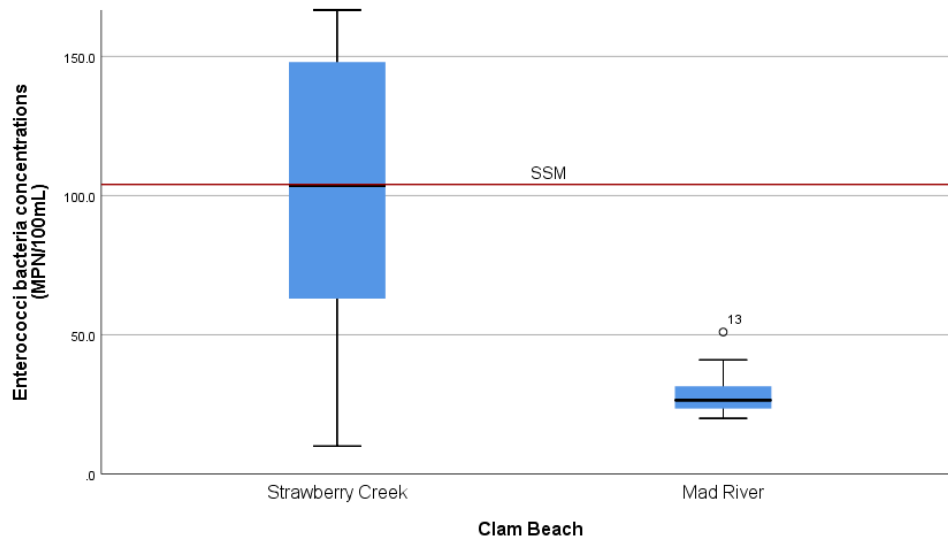

b

**Figure S2. a-b.** Distribution of fecal indicator bacteria *E. coli* and enterococci concentrations in samples collected at Clam Beach near Strawberry Creek and Clam Beach near Mad River for the 11-hour study. The single sample maximum (SSM) threshold is indicated on the plot. The boxes represent the interquartile range distribution around the median and the whiskers represent the 10<sup>th</sup> and 90<sup>th</sup> percentiles.

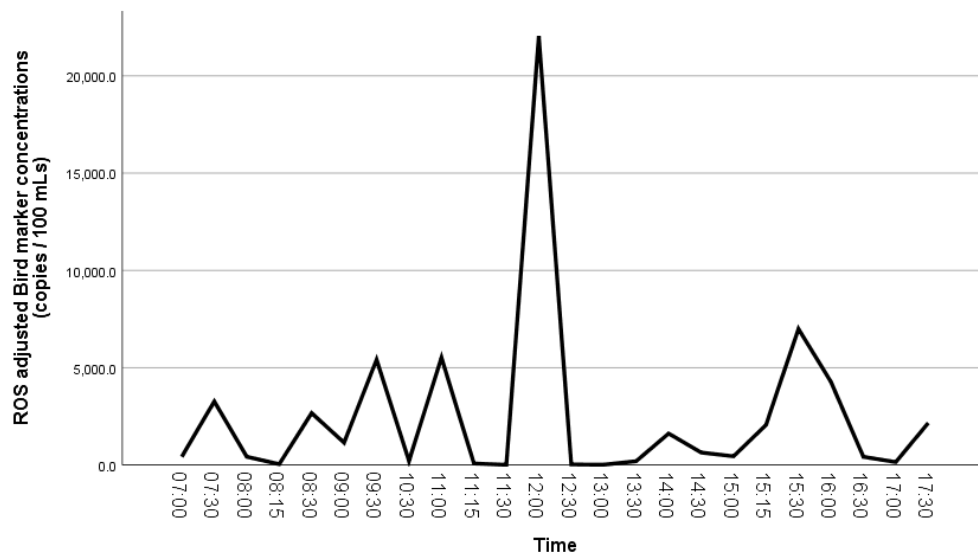

**Figure S3.** The mean distributions of bird marker concentrations from 07:30 to 17:30 are shown.

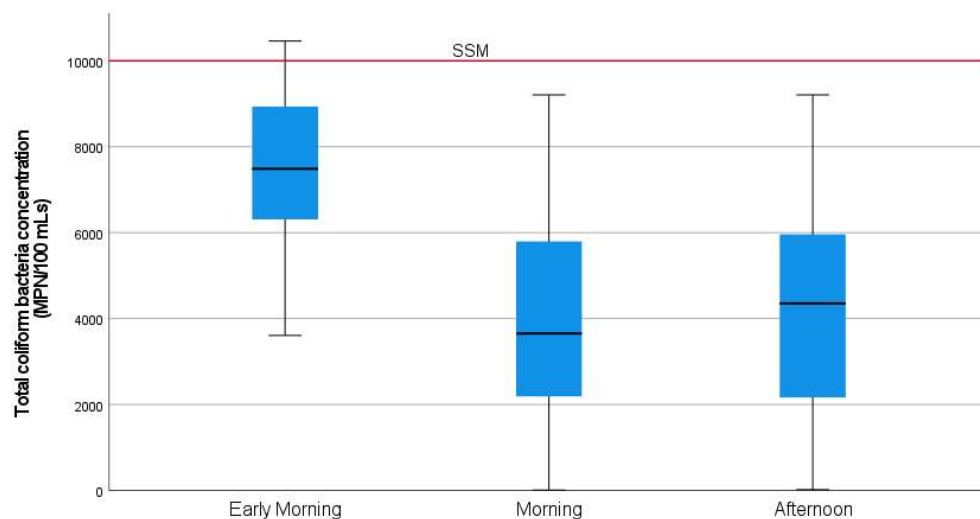

**Figure S4.** Distribution of total coliform concentrations in samples collected at early morning (7:00 am – 8:15 am), morning (8:30 am – 11:30 am) and afternoon (12:00 pm – 17:30 pm). The single sample maximum (SSM) threshold is indicated on the plot.

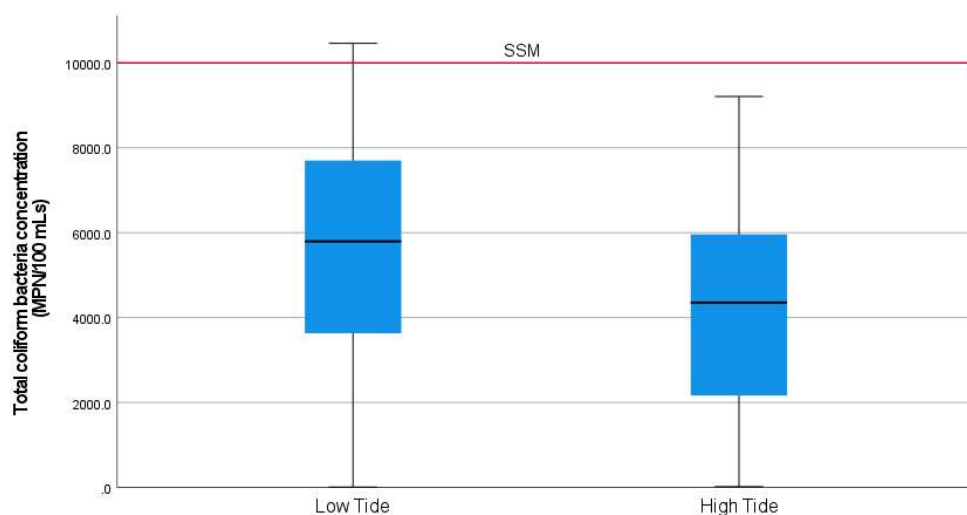

(a)

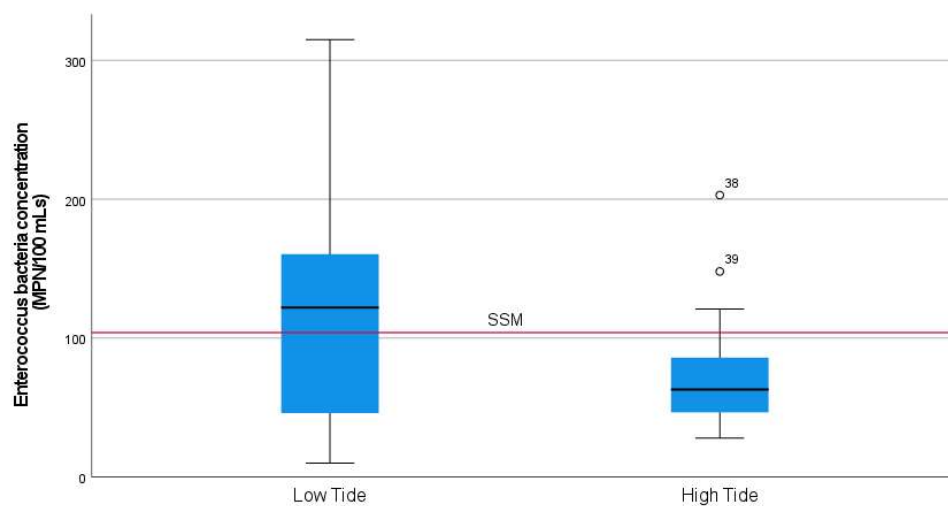

(b)

**Figure S5. a-b.** Distribution of total coliform and enterococci concentrations at low and high tide at all locations sampled. The single sample maximum (SSM) threshold is indicated on the plot.

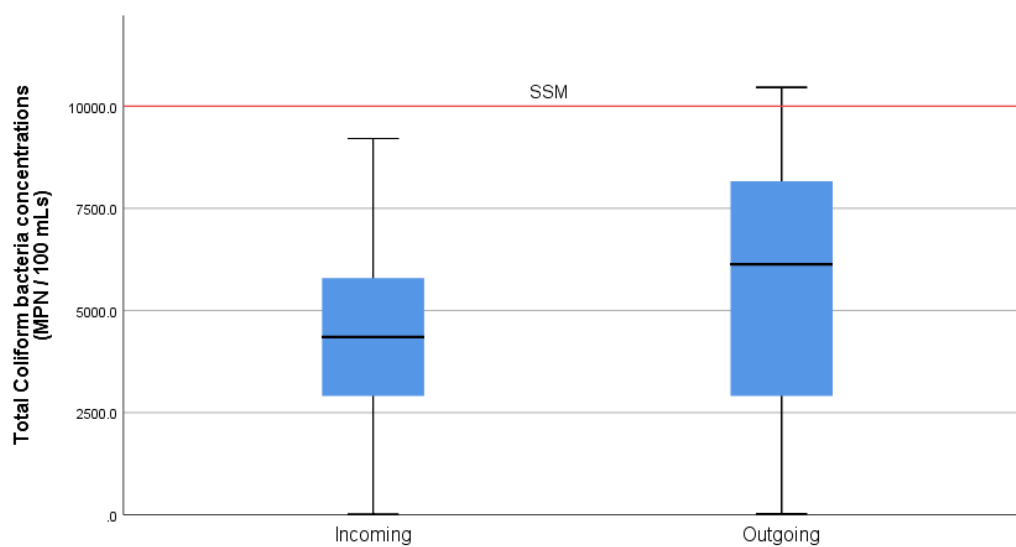

**Figure S6.** Distribution of total coliform bacteria concentrations at incoming and outgoing tide at all locations sampled. The single sample maximum (SSM) threshold is indicated on the plot.

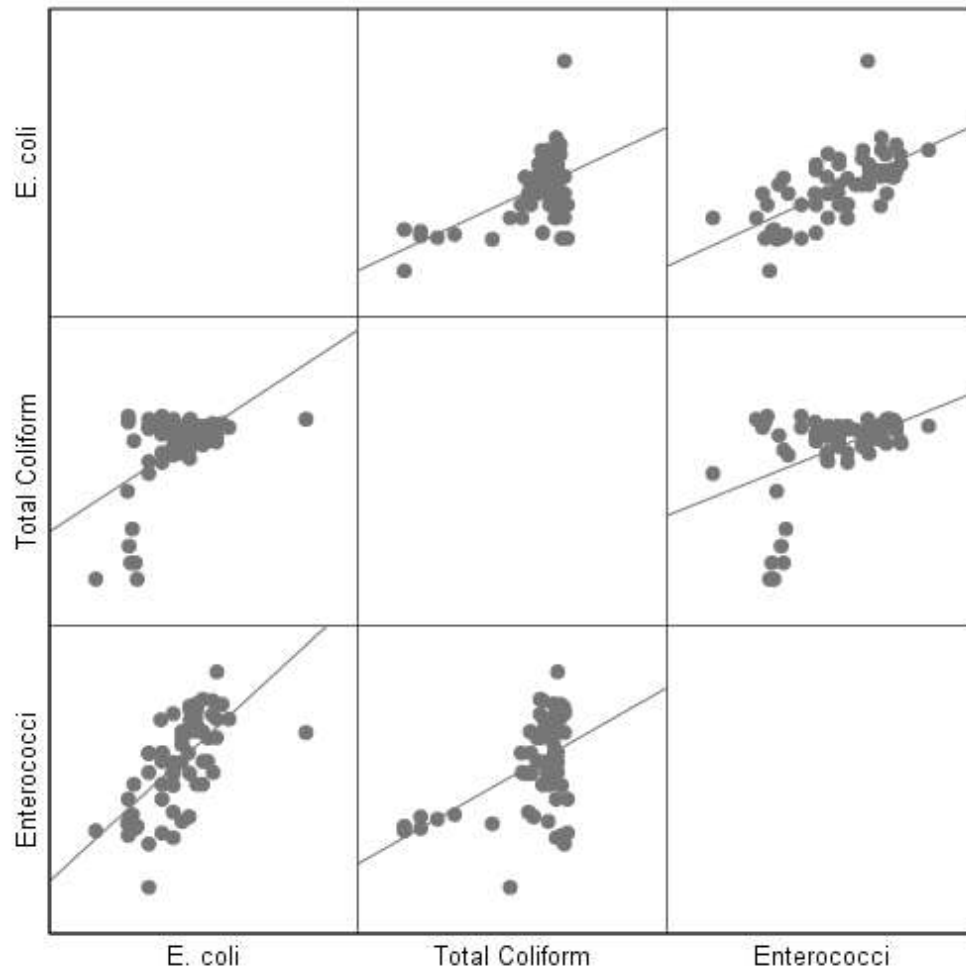

**Figure S7.** Scatter plot of fecal indicator bacteria *E. coli*, total coliform and enterococci.

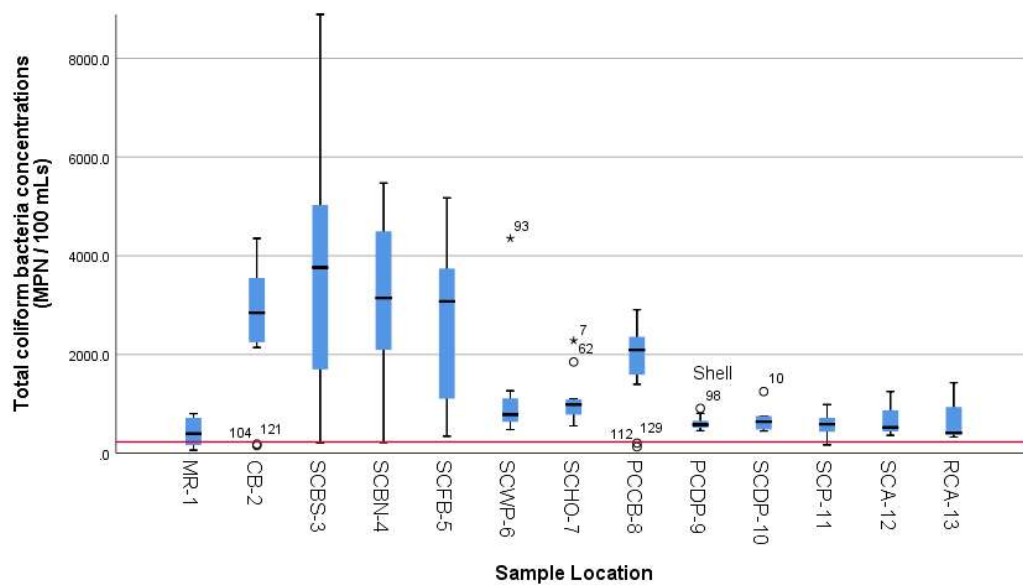

(a)

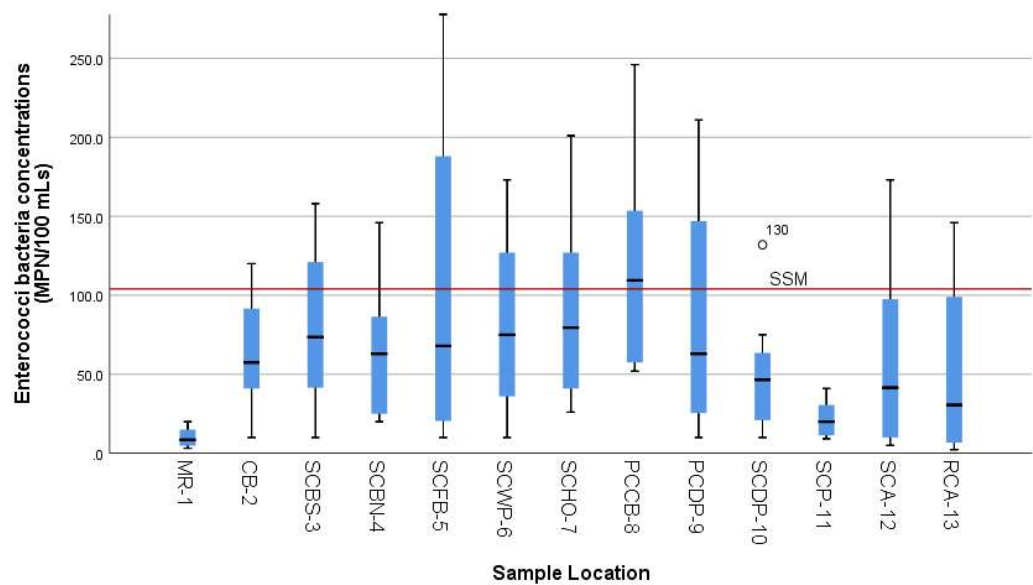

(b)

**Figure S8.** Distribution of total coliform and enterococci bacteria concentrations at each location sampled. The single sample maximum (SSM) threshold and SHELL bacteria objective is indicated.

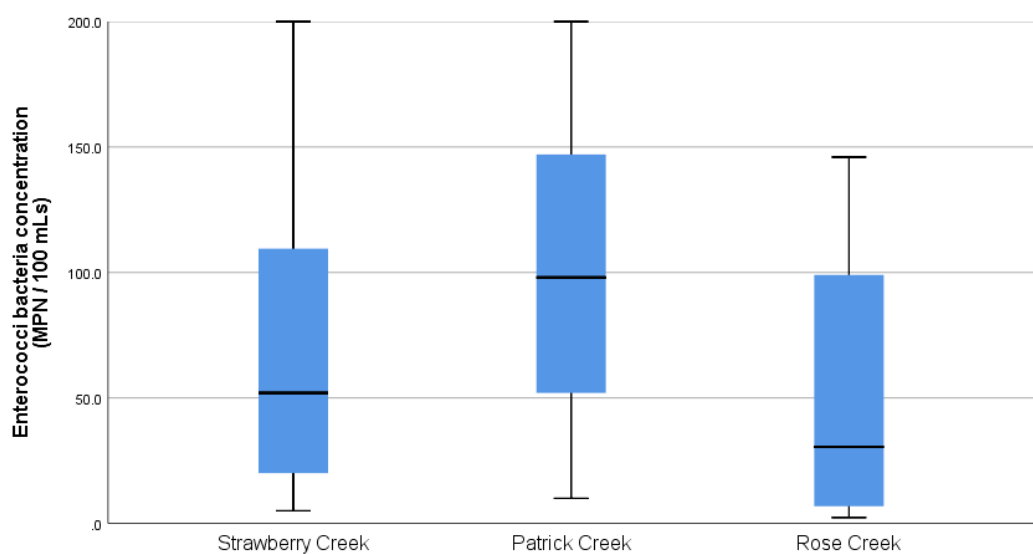

**Figure S9.** Distribution of enterococci bacteria concentrations at each creek sampled.

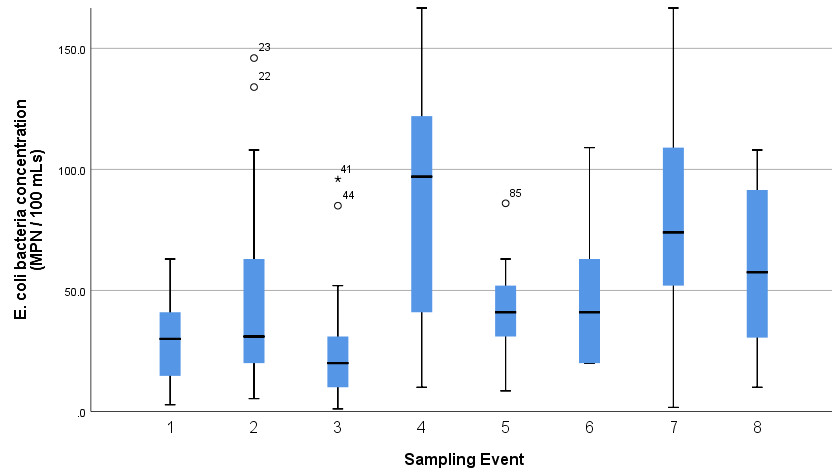

(a)

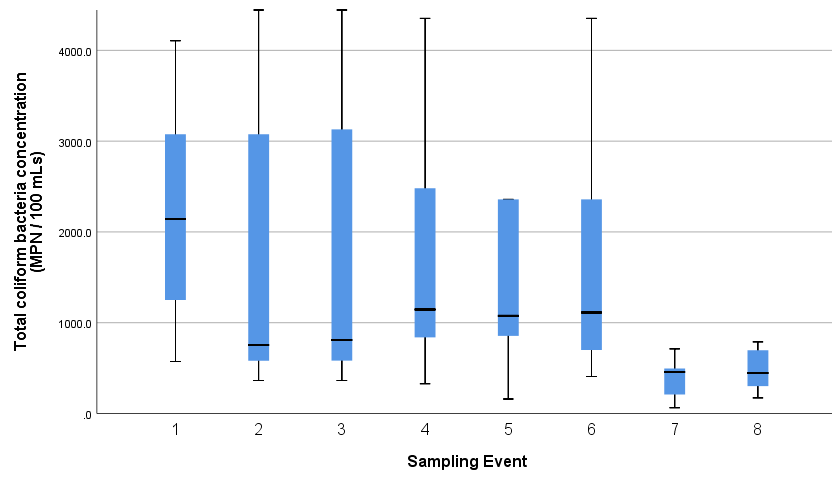

(b)

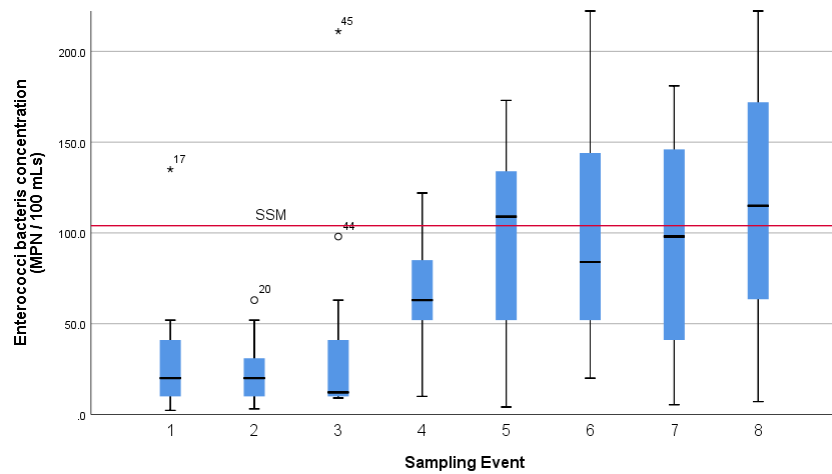

(c)

Figure S10. Distribution of FIB concentrations at each sampling event. .



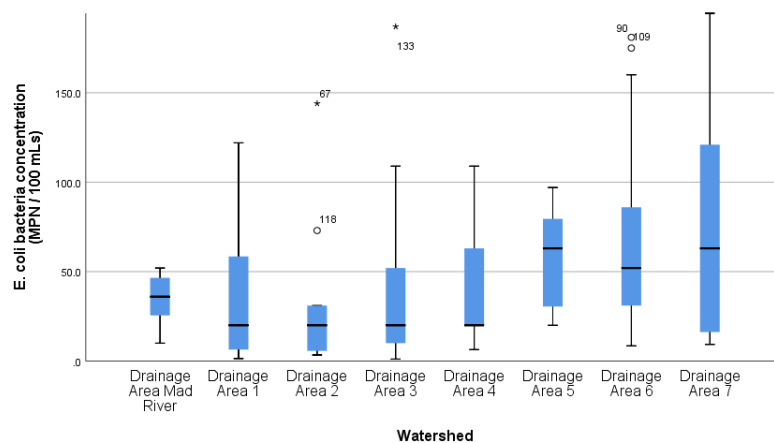

(a)

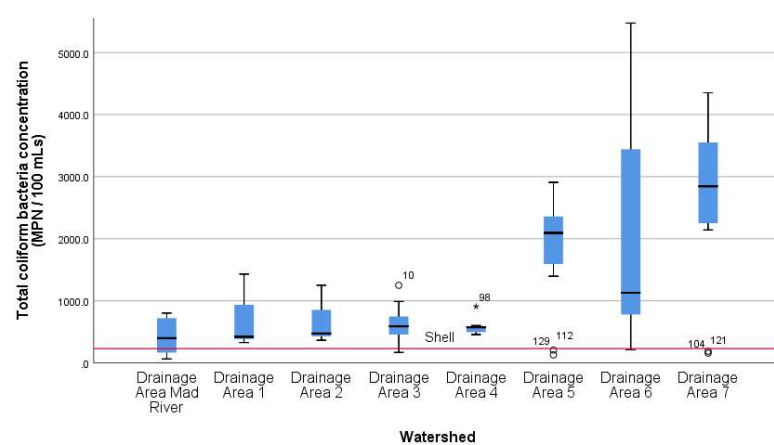

(b)

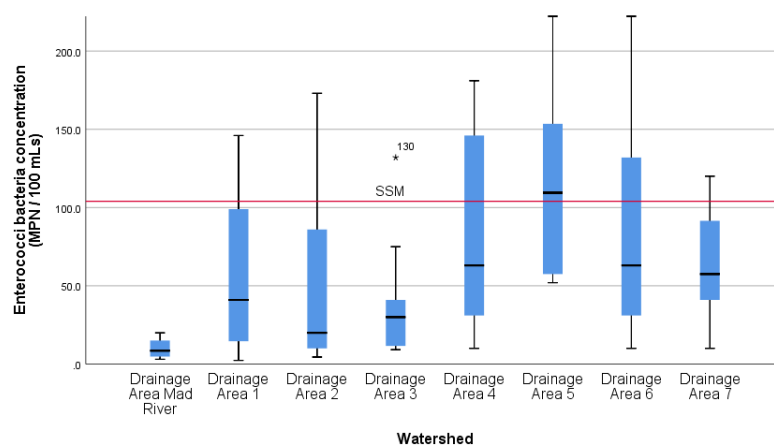

(c)

**Figure S11.** Distribution of FIB bacteria concentrations at each drainage area. The single sample maximum (SSM) threshold and SHELL bacteria objective are indicated.

## SUPPLEMENTAL TABLES

**Table S1.** Summary of animal-host microbial source tracking marker concentration measurements in samples collected at Clam Beach near Strawberry Creek during the dry weather beach monitoring season from August 2015 to April 2018.

| Sample Results    | Number and Percent of Animal-Host Markers |              |              |              |
|-------------------|-------------------------------------------|--------------|--------------|--------------|
|                   | Human                                     | Ruminant     | Dog          | Bird         |
| Not Detected      | 95/103 (92%)                              | 85/103 (82%) | 58/103 (56%) | 29/103 (28%) |
| BLOQ <sup>a</sup> | 7/103 (7%)                                | 13/103 (13%) | 38/103 (37%) | 31/103 (30%) |
| Quantified        | 1/103 (1%)                                | 5/103 (5%)   | 7/103 (7%)   | 43/103 (42%) |

<sup>a</sup>BLOQ = Below Limit of Quantification

**Table S2.** Summary of the sanitation survey conducted for all collection sites selected for this project.

| Site ID | Location Description (# of samples)                         | Significant Characteristics of Study Site and Land Use                                                                                                                                                                                                                                                                                                            |
|---------|-------------------------------------------------------------|-------------------------------------------------------------------------------------------------------------------------------------------------------------------------------------------------------------------------------------------------------------------------------------------------------------------------------------------------------------------|
| Site 1  | Mad River (8)                                               | <ul style="list-style-type: none"> <li>At mouth of Mad River and Clam Beach</li> <li>Routine county beach sampling site</li> <li>Not impaired and used as reference location to CB-2</li> </ul>                                                                                                                                                                   |
| Site 2a | Clam Beach (12)                                             | <ul style="list-style-type: none"> <li>At mouth of Strawberry Creek and Clam Beach</li> <li>Routine county beach sampling site</li> <li>Represents drainage area 7 – entire study area, ocean site, public</li> <li>Impaired and location of interest</li> </ul>                                                                                                  |
| Site 3  | Strawberry Creek – Beach South (8)                          | <ul style="list-style-type: none"> <li>Along Strawberry Creek, most south sample – freshwater</li> <li>Represents drainage area 6 – Strawberry Creek, public land use</li> </ul>                                                                                                                                                                                  |
| Site 4  | Strawberry Creek – Beach North (12)                         | <ul style="list-style-type: none"> <li>Along Strawberry Creek, slightly north of SITE 3 – freshwater</li> <li>Represents drainage area 6 – Strawberry Creek, public land use</li> </ul>                                                                                                                                                                           |
| Site 5  | Strawberry Creek -Foot-bridge (12)                          | <ul style="list-style-type: none"> <li>Foot bridge and main access point to beach, public land use</li> <li>Most human and dog activity concentrated in one spot</li> <li>Represents drainage area 6 – Patrick Creek &amp; Strawberry Creek</li> <li>Walking path over Strawberry Creek – frequently used by bikers, walkers, runners, horses and dogs</li> </ul> |
| Site 6  | Strawberry Creek – Walking Path (12)                        | <ul style="list-style-type: none"> <li>Not influenced by Patrick Creek watershed</li> <li>Represents drainage area 6 – Strawberry Creek only</li> <li>Public and medium density residential land use</li> </ul>                                                                                                                                                   |
| Site 7  | Strawberry Creek – Highway Offramp (12)                     | <ul style="list-style-type: none"> <li>Not influenced by Patrick Creek watershed or public access</li> <li>Represents drainage area 6 – Strawberry Creek only</li> <li>Public and medium density residential land use</li> </ul>                                                                                                                                  |
| Site 8  | Patrick Creek – near Clam Beach (12)                        | <ul style="list-style-type: none"> <li>Patrick Creek mouth before it reached Strawberry Creek</li> <li>Represents drainage area 5 and Patrick Creek watershed</li> <li>Public, agriculture and low-density residential land use</li> </ul>                                                                                                                        |
| Site 9  | Patrick Creek – Dows Prairie Rd. (12)                       | <ul style="list-style-type: none"> <li>Upstream Patrick Creek – primarily agriculture</li> <li>Represents drainage area 4 and Patrick Creek watershed</li> <li>Agriculture and medium density residential land use</li> <li>About 1,600 meters upstream Strawberry Creek</li> </ul>                                                                               |
| Site 10 | Strawberry Creek – Dows Prairie Rd. & Arthur Lane (8)       | <ul style="list-style-type: none"> <li>Represents drainage area 3</li> <li>Duke Creek and Strawberry Creek watersheds</li> <li>Medium density residential land use</li> </ul>                                                                                                                                                                                     |
| Site 11 | Strawberry Creek Pond – Dows Prairie Rd. & Arthur Lane (12) | <ul style="list-style-type: none"> <li>Pond adjacent to Strawberry Creek, 100 ft. from SITE 10</li> <li>Represents drainage area 3</li> <li>Duke Creek &amp; Strawberry Creek watersheds</li> <li>Medium density residential land use</li> </ul>                                                                                                                  |
| Site 12 | Strawberry Creek – Arthur Lane (8)                          | <ul style="list-style-type: none"> <li>About 2,100 meters upstream Strawberry Creek</li> <li>Represents drainage area 2 and Strawberry Creek watershed</li> <li>Agriculture and timberland land use</li> </ul>                                                                                                                                                    |
| Site 13 | Rose Creek – Arthur Lane (8)                                | <ul style="list-style-type: none"> <li>2,500 meters upstream Strawberry Creek @ mouth of Rose Creek</li> <li>Represents drainage area 1 – Rose Creek watershed</li> <li>Agriculture land use</li> </ul>                                                                                                                                                           |

**Table S3.** Description of qPCR Parameters Used for this Study.

| Analytical Step              | Critical Parameters to be Reported with Results                             | Study Parameters                                                                                                                                                                                                                                                     |
|------------------------------|-----------------------------------------------------------------------------|----------------------------------------------------------------------------------------------------------------------------------------------------------------------------------------------------------------------------------------------------------------------|
| Sample Preparation           | Volume of water analyzed and filtration method(s)                           | 100 mL sample filtered with Supor membrane (pore size 0.2um) (Pall Corporation, Ann Arbor, MI)<br>A 0.2 µg/mL of salmon DNA (Sigma Aldrich, St. Louis, MO) in AE buffer (Qiagen, Germantown, MD) was added to each sample and                                        |
| Sample Preparation           | Method used to extract nucleic acids                                        | bead beat using a Biospec mini bead beater-16 for 60 seconds, followed by purification using the MagMAX™ Viral/Pathogen II Nucleic Acid Isolation Kit. Nucleic acid isolation was performed via an automated process using the KingFisher™ Flex Purification System. |
| Sample Preparation           | DNA yield and purity                                                        | Samples will not be assessed for purity and DNA yield. Just for inhibition for Sketa and/or IAC.                                                                                                                                                                     |
| Detection of MST Target      | Instrument used for amplification                                           | ABI 7500 Fast Dx, SDS software version 1.4.1, Applied Biosystems.                                                                                                                                                                                                    |
| Detection of MST Target      | Evidence for absence of inhibition                                          | Use of Sketa sample processing and inhibition control, in accordance with EPA Method B. Use of IAC in the HF183 PCR assay, in accordance with the SCCWRP - California Microbial Source Identification Manual.                                                        |
| Detection of MST Target      | Definition of positive detection                                            | Detection within the linear dynamic range of the method accompanied by expected results from controls.                                                                                                                                                               |
| Detection of MST Target      | Definition of limit of detection (LOD)                                      | The LOD of the qPCR assays are defined as the theoretical lower limit of detection which is 1 copy per qPCR reaction and results below the LOD are characterized as non-detectable (ND)                                                                              |
| Detection of MST Target      | Definition of limit of quantification (LOQ) and LLOQ                        | The lower limit of quantification (LLOQ) is defined as the LOQ, and in all assays used in this project is determined to be 10 copies per qPCR reaction.                                                                                                              |
| Detection of MST Target      | Definition of below limit of quantification (BLOQ)                          | qPCR results below the LOQ (10 copies per qPCR reaction) but above the LOD (1 copy per qPCR reaction) are characterized as detected below limit of quantification (BLOQ)                                                                                             |
| Quantification of MST Target | Calibration curve with slope, y-intercept, r', and efficiency amplification | $Y = MX + B$ ; amplification efficiency (E) = $(10^{(-1/\text{slope})}) - 1$                                                                                                                                                                                         |
| Quantification of MST Target | Reference material used to generate a standard curve                        | The GenBac assay will use genomic DNA, whereas all species-specific markers Plasmid DNA will be used.                                                                                                                                                                |
| Quantification of MST Target | Instrument used to quantify DNA or RNA in standards                         | Measured with a Nanodrop Lite (Thermo-Scientific, Wilmington, DE)                                                                                                                                                                                                    |
| Quantification of MST Target | Evidence for absence of contaminating DNA                                   | No template controls; extraction method blanks; field blanks                                                                                                                                                                                                         |
| Quantification of MST Target | Definition of quantifiable replicate reactions                              | All replicates must be within 0.5 C <sub>1</sub> of each other and will be averaged.                                                                                                                                                                                 |
| Quantification of MST Target | Evidence for absence of partial or complete inhibition                      | Internal amplification control spike, specifically, use of Sketa sample processing and inhibition control, in accordance with EPA Method B. Use of IAC in the HF183 PCR assay, in accordance with the SCCWRP - California Microbial Source Identification Manual.    |

**Table S4.** Laboratory Results for animal-host microbial source tracking marker concentrations and fecal indicator bacteria concentrations for the 11-hour study<sup>a</sup>.

| Sampling Time | Location   | Sample ID | Human (HF183 copies/100 mL) | Ruminant (Rum2Bac copies/100mL) | Dog (DogBact copies/100 mL) | Bird (LeeSeagull copies/100 mL) | <i>E. coli</i> (Colilert-18) MPN/100mL | Total Coliform (Colilert-18) MPN/100mL | Enterococci (Enterolert) MPN/100 mL |
|---------------|------------|-----------|-----------------------------|---------------------------------|-----------------------------|---------------------------------|----------------------------------------|----------------------------------------|-------------------------------------|
| 7:00          | SITE 2A    | W20-0987  | ND                          | ND                              | ND                          | 850                             | 85                                     | 5,172                                  | 134                                 |
| 7:00          | SITE 2B    | W20-0988  | ND                          | ND                              | BLOQ                        | ND                              | 74                                     | 8,664                                  | 181                                 |
| 7:30          | SITE 2A    | W20-0989  | ND                          | ND                              | ND                          | 6,535                           | 85                                     | 6,131                                  | 135                                 |
| 7:30          | SITE 2B    | W20-0990  | ND                          | ND                              | ND                          | ND                              | 120                                    | 7,701                                  | 158                                 |
| 8:00          | SITE 2A R1 | W20-0991  | ND                          | ND                              | ND                          | 579                             | 75                                     | 9,208                                  | 171                                 |
| 8:00          | SITE 2A R2 | W20-0992  | ND                          | ND                              | ND                          | 734                             | 86                                     | 6,867                                  | 173                                 |
| 8:00          | SITE 2A R3 | W20-0993  | ND                          | ND                              | ND                          | 1,229                           | 75                                     | 3,609                                  | 122                                 |
| 8:00          | SITE 2B R1 | W20-0994  | ND                          | ND                              | ND                          | ND                              | 40                                     | 7,270                                  | 146                                 |
| 8:00          | SITE 2B R2 | W20-0995  | ND                          | ND                              | BLOQ                        | ND                              | 84                                     | 5,172                                  | 148                                 |
| 8:00          | SITE 2B R3 | W20-0996  | ND                          | ND                              | ND                          | ND                              | 171                                    | 6,488                                  | 148                                 |
| 8:15          | SITE 1 R1  | W20-0997  | ND                          | ND                              | ND                          | BLOQ                            | 31                                     | 9,208                                  | 20                                  |
| 8:15          | SITE 1 R2  | W20-0998  | ND                          | ND                              | ND                          | BLOQ                            | 52                                     | 6,488                                  | <10                                 |
| 8:15          | SITE 1 R3  | W20-0999  | ND                          | ND                              | ND                          | ND                              | 52                                     | 8,164                                  | 51                                  |
| 8:15          | SITE 1 R1  | W20-1000  | ND                          | ND                              | ND                          | BLOQ                            | 20                                     | 8,164                                  | <10                                 |
| 8:15          | SITE 1 R2  | W20-1001  | ND                          | ND                              | ND                          | BLOQ                            | 41                                     | 10,462                                 | <10                                 |
| 8:15          | SITE 1 R3  | W20-1002  | ND                          | ND                              | ND                          | BLOQ                            | 20                                     | 10,462                                 | 41                                  |
| 8:30          | SITE 2A    | W20-1003  | ND                          | ND                              | ND                          | 5,340                           | 86                                     | 5,794                                  | 187                                 |
| 8:30          | SITE 2B    | W20-1004  | ND                          | ND                              | ND                          | ND                              | 97                                     | 6,867                                  | 121                                 |
| 9:00          | SITE 2A    | W20-1005  | ND                          | ND                              | BLOQ                        | 2,293                           | 148                                    | 7,701                                  | 187                                 |
| 9:00          | SITE 2B    | W20-1006  | ND                          | ND                              | ND                          | ND                              | 52                                     | 9,208                                  | 161                                 |
| 9:30          | SITE 2A    | W20-1007  | ND                          | ND                              | BLOQ                        | 10,827                          | 132                                    | 6,867                                  | 315                                 |
| 9:30          | SITE 2B    | W20-1008  | ND                          | ND                              | BLOQ                        | ND                              | 84                                     | 5,794                                  | 187                                 |
| 10:30         | SITE 2A    | W20-1012  | ND                          | ND                              | ND                          | 408                             | 110                                    | 5,172                                  | 109                                 |
| 10:30         | SITE 2B    | W20-1013  | ND                          | ND                              | ND                          | ND                              | 86                                     | 5,475                                  | 122                                 |
| 11:00         | SITE 2A R1 | W20-1014  | ND                          | ND                              | ND                          | 24,617                          | 31                                     | 910                                    | 10                                  |
| 11:00         | SITE 2A R2 | W20-1015  | ND                          | ND                              | ND                          | 2,505                           | 52                                     | 2,909                                  | 74                                  |
| 11:00         | SITE 2A R3 | W20-1016  | ND                          | ND                              | ND                          | 5,990                           | <10                                    | 3,654                                  | 52                                  |
| 11:00         | SITE 2B R1 | W20-1017  | ND                          | ND                              | ND                          | ND                              | 75                                     | 3,873                                  | 146                                 |
| 11:00         | SITE 2B R2 | W20-1018  | ND                          | ND                              | ND                          | ND                              | 84                                     | 3,255                                  | 160                                 |
| 11:00         | SITE 2B R3 | W20-1019  | ND                          | ND                              | ND                          | ND                              | 120                                    | 3,654                                  | 199                                 |
| 11:15         | SITE 1 R1  | W20-1020  | ND                          | ND                              | ND                          | BLOQ                            | 10                                     | 10                                     | <10                                 |
| 11:15         | SITE 1 R2  | W20-1021  | ND                          | ND                              | ND                          | ND                              | <10                                    | 20                                     | <10                                 |
| 11:15         | SITE 1 R3  | W20-1022  | ND                          | ND                              | ND                          | 206                             | <10                                    | 10                                     | <10                                 |
| 11:30         | SITE 2A    | W20-1026  | ND                          | ND                              | ND                          | ND                              | 41                                     | 1,467                                  | 86                                  |
| 11:30         | SITE 2B    | W20-1027  | ND                          | ND                              | ND                          | ND                              | 98                                     | 3,076                                  | 75                                  |
| 12:00         | SITE 2A    | W20-1028  | ND                          | ND                              | ND                          | 44,058                          | 52                                     | 4,352                                  | 63                                  |
| 12:00         | SITE 2B    | W20-1029  | ND                          | ND                              | ND                          | ND                              | 109                                    | 4,352                                  | 75                                  |
| 12:30         | SITE 2A    | W20-1030  | ND                          | ND                              | ND                          | ND                              | 98                                     | 3,255                                  | 203                                 |
| 12:30         | SITE 2B    | W20-1031  | ND                          | ND                              | ND                          | BLOQ                            | 132                                    | 4,611                                  | 148                                 |
| 13:00         | SITE 2A    | W20-1032  | ND                          | ND                              | ND                          | ND                              | <10                                    | 426                                    | <10                                 |
| 13:00         | SITE 2B    | W20-1033  | ND                          | ND                              | ND                          | ND                              | 63                                     | 2,143                                  | 121                                 |
| 13:30         | SITE 2A    | W20-1034  | ND                          | ND                              | ND                          | 362                             | 31                                     | 1,515                                  | 63                                  |
| 13:30         | SITE 2B    | W20-1035  | ND                          | ND                              | ND                          | ND                              | 52                                     | 2,247                                  | 62                                  |
| 14:00         | SITE 2A    | W20-1037  | ND                          | ND                              | ND                          | 2,695                           | 41                                     | 4,884                                  | 52                                  |
| 14:00         | SITE 2B    | W20-1038  | ND                          | ND                              | ND                          | 541                             | 41                                     | 5,172                                  | 75                                  |
| 14:30         | SITE 2A    | W20-1039  | ND                          | ND                              | ND                          | 1,078                           | 31                                     | 6,131                                  | 85                                  |
| 14:30         | SITE 2B    | W20-1040  | ND                          | ND                              | ND                          | 209                             | 72                                     | 6,131                                  | 86                                  |
| 15:00         | SITE 2A R1 | W20-1041  | ND                          | ND                              | ND                          | 383                             | 86                                     | 3,654                                  | 52                                  |
| 15:00         | SITE 2A R2 | W20-1042  | ND                          | ND                              | ND                          | 1,168                           | 52                                     | 6,867                                  | 63                                  |
| 15:00         | SITE 2A R3 | W20-1043  | ND                          | ND                              | ND                          | 718                             | 63                                     | 5,794                                  | 98                                  |
| 15:00         | SITE 2B R1 | W20-1044  | ND                          | ND                              | ND                          | BLOQ                            | 41                                     | 6,488                                  | 41                                  |
| 15:00         | SITE 2B R2 | W20-1045  | ND                          | ND                              | ND                          | BLOQ                            | 62                                     | 6,867                                  | 74                                  |
| 15:00         | SITE 2B R3 | W20-1046  | ND                          | ND                              | BLOQ                        | 205                             | 63                                     | 4,611                                  | <10                                 |
| 15:15         | SITE 1 R1  | W20-1047  | ND                          | ND                              | ND                          | 2,798                           | <10                                    | 41                                     | <10                                 |
| 15:15         | SITE 1 R2  | W20-1048  | ND                          | ND                              | ND                          | 2,033                           | <10                                    | 20                                     | <10                                 |
| 15:15         | SITE 1 R3  | W20-1049  | ND                          | ND                              | ND                          | 1,330                           | <10                                    | 85                                     | <10                                 |
| 15:30         | SITE 2A    | W20-1053  | ND                          | ND                              | ND                          | 13,835                          | 884                                    | 9,208                                  | 119                                 |
| 15:30         | SITE 2B    | W20-1054  | ND                          | ND                              | ND                          | BLOQ                            | 122                                    | 6,131                                  | 63                                  |
| 16:00         | SITE 2A    | W20-1055  | ND                          | ND                              | ND                          | 8,355                           | 97                                     | 4,884                                  | 52                                  |

| Sampling Time | Location | Sample ID | Human (HF183 cop-ies/100 mL) | Ruminant (Rum2Bac cop-ies/100mL) | Dog (DogBact cop-ies/100 mL) | Bird (LeeSeagull cop-ies/100 mL) | <i>E. coli</i> (Colilert-18) MPN/100mL | Total Coliform (Colilert-18) MPN/100mL | Enterococci (Enterolert) MPN/100 mL |
|---------------|----------|-----------|------------------------------|----------------------------------|------------------------------|----------------------------------|----------------------------------------|----------------------------------------|-------------------------------------|
| 16:00         | SITE 2B  | W20-1056  | ND                           | ND                               | ND                           | 206                              | 31                                     | 6,867                                  | 86                                  |
| 16:30         | SITE 2A  | W20-1058  | ND                           | ND                               | ND                           | 800                              | 74                                     | 1,723                                  | 62                                  |
| 16:30         | SITE 2B  | W20-1059  | ND                           | ND                               | ND                           | ND                               | 73                                     | 2,481                                  | 31                                  |
| 17:00         | SITE 2A  | W20-1060  | ND                           | ND                               | ND                           | BLOQ                             | 63                                     | 2,909                                  | 109                                 |
| 17:00         | SITE 2B  | W20-1061  | ND                           | ND                               | ND                           | BLOQ                             | 41                                     | 2,187                                  | 86                                  |
| 17:30         | SITE 2A  | W20-1062  | ND                           | ND                               | ND                           | 4,272                            | 131                                    | 3,448                                  | 110                                 |
| 17:30         | SITE 2B  | W20-1063  | ND                           | ND                               | ND                           | ND                               | 52                                     | 1,989                                  | <10                                 |

\*RED font indicates when the sample exceeded the single sample maximum limits. (ND = not detected; BLOQ = below limit of quantification; < = Lower Limit of Quantitation; R = replicate)

**Table S5.** Descriptive statistics of fecal indicator bacteria and the ROS (regression on order statistics) adjusted bird microbial source tracking marker in samples collected for the 11-Hr study at all sites combined.

|                          | FIB (MPN/100ml) |                |             | MST (copies/100ml) |
|--------------------------|-----------------|----------------|-------------|--------------------|
|                          | <i>E. coli</i>  | Total Coliform | Enterococci | Bird (ROS)         |
| Number of Samples        | 66              | 66             | 66          | 66                 |
| Median                   | 63              | 5,028          | 80          | 154                |
| Mean                     | 79              | 4,794          | 94          | 2,250              |
| Standard Deviation       | 107             | 2,792          | 61          | 6,513              |
| Coefficient of Variation | 135%            | 58%            | 65%         | 290%               |
| 90 Percentile            | 125             | 8,857          | 183         | 6,154              |

**Table S6.** Summary of Spearman Rank correlations conducted between fecal indicator bacteria in samples collected at Clam Beach at Strawberry Creek and Clam Beach near Mad River.

|                |                         | <i>E. coli</i> | Total Coliform | Enterococci |
|----------------|-------------------------|----------------|----------------|-------------|
| <i>E. coli</i> | Correlation Coefficient | 1.000          | 0.271*         | 0.691**     |
|                | Sig. (2-tailed)         | .              | 0.028          | 0.000       |
|                | N                       | 66             | 66             | 66          |
| Total Coliform | Correlation Coefficient | 0.271*         | 1.000          | 0.314*      |
|                | Sig. (2-tailed)         | 0.028          | .              | 0.010       |
|                | N                       | 66             | 66             | 66          |
| Enterococci    | Correlation Coefficient | 0.691**        | 0.314*         | 1.000       |
|                | Sig. (2-tailed)         | 0.000          | 0.010          | .           |
|                | N                       | 66             | 66             | 66          |

\*\* . Correlation is significant at the 0.01 level (2-tailed). Considered strong association.  
\* . Correlation is significant at the 0.05 level (2-tailed). Considered weak association.

**Table S7.** Laboratory Results for animal-host microbial source tracking marker concentrations and fecal indicator bacteria concentrations <sup>a</sup>.

| Sampling Event | Location | Sample ID | Human (HF183 cop-ies/100mL) | Ruminant (Rum2Bac cop-ies/100mL) | Dog (DogBact cop-ies/100mL) | Bird (LeeSeagull CAT cop-ies/100mL) | <i>E. coli</i> (Colilert-18) MPN/100mL | Total Coliform (Colilert-18) MPN/100mL | Enterococci (Enterolert) MPN/100mL |
|----------------|----------|-----------|-----------------------------|----------------------------------|-----------------------------|-------------------------------------|----------------------------------------|----------------------------------------|------------------------------------|
| 1              | SITE 1   | W20-0461  | ND                          | ND                               | ND                          | BLOQ                                | 41                                     | 738                                    | 10                                 |
| 2              | SITE 1   | W20-0532  | ND                          | ND                               | ND                          | ND                                  | 31                                     | 411                                    | <10                                |
| 3              | SITE 1   | W20-0566  | ND                          | BLOQ                             | ND                          | BLOQ                                | 31                                     | 801                                    | 20                                 |
| 4              | SITE 1   | W20-0637  | ND                          | ND                               | ND                          | BLOQ                                | 41                                     | 384                                    | 10                                 |
| 5              | SITE 1   | W20-0712  | ND                          | ND                               | ND                          | ND                                  | 52                                     | 160                                    | <10                                |
| 6              | SITE 1   | W20-0761  | ND                          | ND                               | ND                          | ND                                  | 20                                     | 700                                    | 20                                 |
| 7              | SITE 1   | W20-0787  | ND                          | ND                               | ND                          | BLOQ                                | 10                                     | 63                                     | <10                                |
| 8              | SITE 1   | W20-0876  | ND                          | ND                               | ND                          | ND                                  | 52                                     | 172                                    | <10                                |
| 1              | SITE 2A  | W20-0462  | ND                          | ND                               | BLOQ                        | ND                                  | 63                                     | 3,076                                  | 52                                 |
| 1              | SITE 2A  | W20-0484  | ND                          | ND                               | ND                          | ND                                  | 63                                     | 3,448                                  | 10                                 |
| 1              | SITE 2A  | W20-0485  | ND                          | ND                               | BLOQ                        | ND                                  | 41                                     | 3,448                                  | 41                                 |
| 2              | SITE 2A  | W20-0533  | ND                          | BLOQ                             | ND                          | BLOQ                                | 108                                    | 3,654                                  | 41                                 |
| 3              | SITE 2A  | W20-0567  | ND                          | BLOQ                             | ND                          | ND                                  | 10                                     | 3,873                                  | 10                                 |
| 4              | SITE 2A  | W20-0638  | ND                          | 769                              | ND                          | ND                                  | 158                                    | 2,142                                  | 85                                 |
| 4              | SITE 2A  | W20-0639  | ND                          | BLOQ                             | ND                          | ND                                  | 199                                    | 2,481                                  | 85                                 |
| 4              | SITE 2A  | W20-0640  | ND                          | BLOQ                             | ND                          | ND                                  | 134                                    | 4,352                                  | 110                                |
| 5              | SITE 2A  | W20-0713  | ND                          | ND                               | ND                          | ND                                  | <10                                    | 2,359                                  | 52                                 |

| Sampling Event | Location | Sample ID | Human (HF183 cop-ies/100mL) | Ruminant (Rum2Bac cop-ies/100mL) | Dog (DogBact cop-ies/100mL) | Bird (LeeSeagull CAT cop-ies/100mL) | <i>E. coli</i> (Colilert-18) MPN/100mL | Total Coliform (Colilert-18) MPN/100mL | Enterococci (Enterolert) MPN/100mL |
|----------------|----------|-----------|-----------------------------|----------------------------------|-----------------------------|-------------------------------------|----------------------------------------|----------------------------------------|------------------------------------|
| 6              | SITE 2A  | W20-0762  | ND                          | ND                               | ND                          | ND                                  | 20                                     | 2,613                                  | 63                                 |
| 7              | SITE 2A  | W20-0788  | ND                          | BLOQ                             | ND                          | BLOQ                                | 86                                     | 156                                    | 120                                |
| 8              | SITE 2A  | W20-0877  | ND                          | ND                               | ND                          | ND                                  | <10                                    | 186                                    | 98                                 |
| 1              | SITE 3   | W20-0463  | ND                          | ND                               | ND                          | ND                                  | 10                                     | 2,909                                  | 10                                 |
| 2              | SITE 3   | W20-0534  | ND                          | BLOQ                             | ND                          | ND                                  | 63                                     | 5,172                                  | 63                                 |
| 3              | SITE 3   | W20-0568  | ND                          | ND                               | ND                          | ND                                  | 20                                     | 3,873                                  | 31                                 |
| 4              | SITE 3   | W20-0641  | ND                          | BLOQ                             | ND                          | ND                                  | 75                                     | 3,654                                  | 110                                |
| 5              | SITE 3   | W20-0714  | ND                          | ND                               | ND                          | ND                                  | 52                                     | 4,884                                  | 132                                |
| 6              | SITE 3   | W20-0763  | ND                          | ND                               | ND                          | ND                                  | 63                                     | 9,208                                  | 84                                 |
| 7              | SITE 3   | W20-0789  | ND                          | BLOQ                             | ND                          | ND                                  | 63                                     | 209                                    | 52                                 |
| 8              | SITE 3   | W20-0878  | ND                          | BLOQ                             | ND                          | ND                                  | 63                                     | 488                                    | 158                                |
| 1              | SITE 4   | W20-0464  | ND                          | ND                               | ND                          | ND                                  | 41                                     | 4,106                                  | 20                                 |
| 2              | SITE 4   | W20-0535  | ND                          | BLOQ                             | ND                          | ND                                  | 31                                     | 2,851                                  | 20                                 |
| 2              | SITE 4   | W20-0536  | ND                          | BLOQ                             | ND                          | ND                                  | 134                                    | 4,884                                  | 20                                 |
| 2              | SITE 4   | W20-0537  | ND                          | 643                              | ND                          | ND                                  | 146                                    | 3,873                                  | 30                                 |
| 3              | SITE 4   | W20-0569  | ND                          | ND                               | ND                          | ND                                  | 20                                     | 3,441                                  | 52                                 |
| 4              | SITE 4   | W20-0642  | ND                          | 588                              | ND                          | ND                                  | 41                                     | 2,481                                  | 63                                 |
| 5              | SITE 4   | W20-0715  | ND                          | ND                               | ND                          | ND                                  | 63                                     | 4,884                                  | 109                                |
| 5              | SITE 4   | W20-0716  | ND                          | ND                               | ND                          | ND                                  | <10                                    | 2,046                                  | 63                                 |
| 5              | SITE 4   | W20-0717  | ND                          | ND                               | ND                          | ND                                  | 31                                     | 2,143                                  | 146                                |
| 6              | SITE 4   | W20-0764  | ND                          | ND                               | ND                          | ND                                  | 41                                     | 5,475                                  | 75                                 |
| 7              | SITE 4   | W20-0790  | ND                          | BLOQ                             | ND                          | ND                                  | 85                                     | 218                                    | 63                                 |
| 8              | SITE 4   | W20-0879  | ND                          | BLOQ                             | ND                          | ND                                  | 30                                     | 290                                    | 98                                 |
| 1              | SITE 5   | W20-0465  | ND                          | BLOQ                             | ND                          | ND                                  | 41                                     | 3,076                                  | 10                                 |
| 2              | SITE 5   | W20-0538  | ND                          | ND                               | ND                          | ND                                  | 31                                     | 3,076                                  | 10                                 |
| 3              | SITE 5   | W20-0570  | ND                          | ND                               | BLOQ                        | ND                                  | 52                                     | 5,172                                  | 31                                 |
| 3              | SITE 5   | W20-0571  | ND                          | ND                               | BLOQ                        | ND                                  | 20                                     | 3,130                                  | 63                                 |
| 3              | SITE 5   | W20-0572  | ND                          | ND                               | BLOQ                        | ND                                  | 96                                     | 3,076                                  | 10                                 |
| 4              | SITE 5   | W20-0643  | ND                          | ND                               | ND                          | ND                                  | 63                                     | 4,352                                  | 63                                 |
| 5              | SITE 5   | W20-0718  | ND                          | ND                               | 4,200                       | ND                                  | 2,178                                  | 12,033                                 | 173                                |
| 6              | SITE 5   | W20-0765  | ND                          | BLOQ                             | ND                          | ND                                  | 181                                    | 1,100                                  | 203                                |
| 6              | SITE 5   | W20-0766  | ND                          | BLOQ                             | ND                          | ND                                  | 41                                     | 1,112                                  | 249                                |
| 6              | SITE 5   | W20-0767  | ND                          | ND                               | ND                          | ND                                  | 109                                    | 1,722                                  | 144                                |
| 7              | SITE 5   | W20-0791  | ND                          | ND                               | ND                          | ND                                  | 41                                     | 344                                    | 73                                 |
| 8              | SITE 5   | W20-0880  | ND                          | ND                               | ND                          | ND                                  | 108                                    | 435                                    | 389                                |
| 1              | SITE 6   | W20-0466  | ND                          | ND                               | BLOQ                        | ND                                  | 20                                     | 1,266                                  | 31                                 |
| 2              | SITE 6   | W20-0539  | ND                          | BLOQ                             | ND                          | ND                                  | 31                                     | 546                                    | 20                                 |
| 3              | SITE 6   | W20-0573  | ND                          | ND                               | ND                          | ND                                  | 10                                     | 780                                    | 10                                 |
| 4              | SITE 6   | W20-0644  | ND                          | 2,089                            | ND                          | ND                                  | 97                                     | 839                                    | 41                                 |
| 4              | SITE 6   | W20-0645  | ND                          | 1,581                            | ND                          | ND                                  | 86                                     | 1,145                                  | 122                                |
| 4              | SITE 6   | W20-0646  | ND                          | BLOQ                             | ND                          | ND                                  | 122                                    | 1,081                                  | 41                                 |
| 5              | SITE 6   | W20-0719  | ND                          | ND                               | ND                          | ND                                  | 41                                     | 480                                    | 122                                |
| 6              | SITE 6   | W20-0768  | ND                          | ND                               | ND                          | ND                                  | 20                                     | 4,352                                  | 52                                 |
| 7              | SITE 6   | W20-0792  | ND                          | ND                               | ND                          | ND                                  | 160                                    | 712                                    | 132                                |
| 7              | SITE 6   | W20-0793  | ND                          | BLOQ                             | ND                          | ND                                  | 175                                    | 586                                    | 98                                 |
| 7              | SITE 6   | W20-0794  | ND                          | ND                               | ND                          | ND                                  | 213                                    | 689                                    | 146                                |
| 8              | SITE 6   | W20-0881  | ND                          | BLOQ                             | ND                          | ND                                  | 52                                     | 785                                    | 173                                |
| 1              | SITE 7   | W20-0467  | ND                          | ND                               | ND                          | BLOQ                                | <10                                    | 2,282                                  | 41                                 |
| 2              | SITE 7   | W20-0540  | ND                          | BLOQ                             | ND                          | ND                                  | 20                                     | 1,017                                  | <10                                |
| 3              | SITE 7   | W20-0574  | ND                          | BLOQ                             | ND                          | ND                                  | 10                                     | 884                                    | 41                                 |
| 4              | SITE 7   | W20-0647  | ND                          | 1,192                            | ND                          | ND                                  | 121                                    | 1,850                                  | 62                                 |
| 5              | SITE 7   | W20-0720  | ND                          | ND                               | ND                          | ND                                  | 41                                     | 1,076                                  | 134                                |
| 5              | SITE 7   | W20-0721  | ND                          | ND                               | ND                          | ND                                  | 52                                     | 959                                    | 31                                 |
| 5              | SITE 7   | W20-0722  | ND                          | ND                               | ND                          | ND                                  | 41                                     | 1,050                                  | 110                                |
| 6              | SITE 7   | W20-0769  | ND                          | BLOQ                             | ND                          | ND                                  | 98                                     | 1,106                                  | 52                                 |
| 7              | SITE 7   | W20-0795  | ND                          | ND                               | ND                          | ND                                  | 74                                     | 556                                    | 120                                |
| 8              | SITE 7   | W20-0882  | ND                          | 710                              | ND                          | ND                                  | 75                                     | 780                                    | 171                                |
| 8              | SITE 7   | W20-0883  | ND                          | BLOQ                             | ND                          | ND                                  | 63                                     | 703                                    | 97                                 |
| 8              | SITE 7   | W20-0884  | ND                          | 755                              | ND                          | ND                                  | 52                                     | 789                                    | 201                                |
| 1              | SITE 8   | W20-0468  | ND                          | ND                               | ND                          | ND                                  | 30                                     | 2,909                                  | 52                                 |
| 1              | SITE 8   | W20-0486  | ND                          | ND                               | ND                          | ND                                  | 63                                     | 2,046                                  | 52                                 |
| 1              | SITE 8   | W20-0487  | ND                          | ND                               | ND                          | ND                                  | 20                                     | 2,143                                  | 135                                |

| Sampling Event | Location | Sample ID | Human (HF183 cop-ies/100mL) | Ruminant (Rum2Bac cop-ies/100mL) | Dog (DogBact cop-ies/100mL) | Bird (LeeSeagull CAT cop-ies/100mL) | <i>E. coli</i> (Colilert-18) MPN/100mL | Total Coliform (Colilert-18) MPN/100mL | Enterococci (Enterolert) MPN/100mL |
|----------------|----------|-----------|-----------------------------|----------------------------------|-----------------------------|-------------------------------------|----------------------------------------|----------------------------------------|------------------------------------|
| 2              | SITE 8   | W20-0541  | 591                         | ND                               | ND                          | ND                                  | 63                                     | 1,789                                  | 52                                 |
| 3              | SITE 8   | W20-0575  | ND                          | ND                               | ND                          | ND                                  | 85                                     | 1,396                                  | 98                                 |
| 4              | SITE 8   | W20-0648  | ND                          | ND                               | ND                          | ND                                  | 97                                     | 2,481                                  | 336                                |
| 5              | SITE 8   | W20-0723  | ND                          | ND                               | ND                          | ND                                  | 52                                     | 1,789                                  | 63                                 |
| 6              | SITE 8   | W20-0770  | ND                          | ND                               | ND                          | ND                                  | 74                                     | 2,187                                  | 161                                |
| 6              | SITE 8   | W20-0771  | ND                          | ND                               | ND                          | ND                                  | 31                                     | 2,359                                  | 96                                 |
| 6              | SITE 8   | W20-0772  | ND                          | ND                               | ND                          | ND                                  | 20                                     | 2,359                                  | 121                                |
| 7              | SITE 8   | W20-0796  | BLOQ                        | BLOQ                             | ND                          | ND                                  | 63                                     | 129                                    | 146                                |
| 8              | SITE 8   | W20-0885  | ND                          | ND                               | ND                          | ND                                  | 384                                    | 206                                    | 246                                |
| 1              | SITE 9   | W20-0469  | ND                          | ND                               | ND                          | ND                                  | 10                                     | 573                                    | 10                                 |
| 2              | SITE 9   | W20-0542  | ND                          | ND                               | ND                          | ND                                  | <10                                    | 583                                    | 31                                 |
| 2              | SITE 9   | W20-0543  | ND                          | ND                               | ND                          | ND                                  | 20                                     | 602                                    | 10                                 |
| 2              | SITE 9   | W20-0544  | ND                          | ND                               | ND                          | ND                                  | 20                                     | 581                                    | 51                                 |
| 3              | SITE 9   | W20-0576  | ND                          | ND                               | ND                          | ND                                  | 31                                     | 809                                    | 211                                |
| 4              | SITE 9   | W20-0649  | ND                          | ND                               | ND                          | ND                                  | 20                                     | 538                                    | 63                                 |
| 5              | SITE 9   | W20-0724  | ND                          | ND                               | ND                          | ND                                  | <10                                    | 712                                    | 20                                 |
| 6              | SITE 9   | W20-0773  | ND                          | ND                               | ND                          | ND                                  | 63                                     | 909                                    | 146                                |
| 7              | SITE 9   | W20-0797  | ND                          | ND                               | ND                          | ND                                  | 75                                     | 457                                    | 181                                |
| 7              | SITE 9   | W20-0798  | ND                          | ND                               | ND                          | ND                                  | 52                                     | 473                                    | 148                                |
| 7              | SITE 9   | W20-0799  | ND                          | ND                               | ND                          | ND                                  | 109                                    | 496                                    | 146                                |
| 1              | SITE 10  | W20-0470  | ND                          | BLOQ                             | ND                          | ND                                  | 20                                     | 1,250                                  | 31                                 |
| 2              | SITE 10  | W20-0545  | ND                          | ND                               | ND                          | ND                                  | 31                                     | 754                                    | 10                                 |
| 3              | SITE 10  | W20-0577  | ND                          | ND                               | ND                          | ND                                  | 10                                     | 538                                    | <10                                |
| 4              | SITE 10  | W20-0650  | ND                          | BLOQ                             | ND                          | ND                                  | 109                                    | 743                                    | 75                                 |
| 5              | SITE 10  | W20-0725  | ND                          | ND                               | ND                          | ND                                  | 31                                     | 754                                    | 52                                 |
| 6              | SITE 10  | W20-0774  | ND                          | BLOQ                             | ND                          | ND                                  | 41                                     | 504                                    | 52                                 |
| 7              | SITE 10  | W20-0800  | ND                          | ND                               | ND                          | ND                                  | 31                                     | 464                                    | 41                                 |
| 8              | SITE 10  | W20-0887  | ND                          | ND                               | ND                          | ND                                  | 63                                     | 450                                    | 132                                |
| 1              | SITE 11  | W20-0471  | ND                          | ND                               | ND                          | ND                                  | <10                                    | 573                                    | <10                                |
| 2              | SITE 11  | W20-0546  | ND                          | ND                               | ND                          | ND                                  | 10                                     | 594                                    | 30                                 |
| 3              | SITE 11  | W20-0578  | ND                          | ND                               | ND                          | ND                                  | 20                                     | 583                                    | <10                                |
| 3              | SITE 11  | W20-0579  | ND                          | ND                               | ND                          | ND                                  | <10                                    | 435                                    | <10                                |
| 3              | SITE 11  | W20-0580  | ND                          | ND                               | ND                          | ND                                  | 10                                     | 743                                    | 10                                 |
| 4              | SITE 11  | W20-0651  | 629                         | ND                               | ND                          | ND                                  | 10                                     | 860                                    | 30                                 |
| 5              | SITE 11  | W20-0726  | ND                          | ND                               | ND                          | ND                                  | 309                                    | 988                                    | 20                                 |
| 6              | SITE 11  | W20-0775  | ND                          | ND                               | ND                          | ND                                  | 20                                     | 683                                    | 20                                 |
| 7              | SITE 11  | W20-0801  | ND                          | ND                               | ND                          | ND                                  | <10                                    | 169                                    | 20                                 |
| 8              | SITE 11  | W20-0888  | ND                          | ND                               | ND                          | ND                                  | 10                                     | 313                                    | 31                                 |
| 8              | SITE 11  | W20-0889  | BLOQ                        | ND                               | ND                          | ND                                  | 218                                    | 691                                    | 41                                 |
| 8              | SITE 11  | W20-0890  | ND                          | ND                               | ND                          | ND                                  | 187                                    | 435                                    | 31                                 |
| 1              | SITE 12  | W20-0472  | ND                          | BLOQ                             | ND                          | ND                                  | 31                                     | 1,250                                  | <10                                |
| 2              | SITE 12  | W20-0547  | ND                          | ND                               | ND                          | ND                                  | <10                                    | 364                                    | 20                                 |
| 3              | SITE 12  | W20-0581  | ND                          | ND                               | ND                          | ND                                  | <10                                    | 428                                    | 10                                 |
| 4              | SITE 12  | W20-0652  | ND                          | 1,145                            | ND                          | ND                                  | 144                                    | 886                                    | 63                                 |
| 5              | SITE 12  | W20-0727  | ND                          | ND                               | ND                          | ND                                  | 10                                     | 855                                    | 173                                |
| 6              | SITE 12  | W20-0776  | ND                          | ND                               | ND                          | ND                                  | 20                                     | 573                                    | 109                                |
| 7              | SITE 12  | W20-0802  | ND                          | ND                               | ND                          | ND                                  | 73                                     | 457                                    | 10                                 |
| 8              | SITE 12  | W20-0891  | ND                          | BLOQ                             | ND                          | ND                                  | 20                                     | 473                                    | 86                                 |
| 1              | SITE 13  | W20-0473  | ND                          | ND                               | ND                          | ND                                  | <10                                    | 1,430                                  | <10                                |
| 2              | SITE 13  | W20-0548  | ND                          | ND                               | ND                          | ND                                  | <10                                    | 384                                    | <10                                |
| 3              | SITE 13  | W20-0582  | ND                          | ND                               | ND                          | ND                                  | <10                                    | 364                                    | <10                                |
| 4              | SITE 13  | W20-0653  | ND                          | BLOQ                             | ND                          | ND                                  | 10                                     | 328                                    | 52                                 |
| 5              | SITE 13  | W20-0728  | ND                          | ND                               | ND                          | ND                                  | 86                                     | 10,462                                 | 345                                |
| 6              | SITE 13  | W20-0777  | ND                          | ND                               | ND                          | ND                                  | 20                                     | 408                                    | 20                                 |
| 7              | SITE 13  | W20-0803  | ND                          | ND                               | ND                          | ND                                  | 122                                    | 420                                    | 41                                 |
| 8              | SITE 13  | W20-0892  | ND                          | ND                               | ND                          | ND                                  | 31                                     | 443                                    | 146                                |

\*RED font indicates when the sample exceeded the single sample maximum limits. (ND = not detected; BLOQ = below limit of quantification; < = Lower Limit of Quantification)

**Table S8.** Descriptive statistics of fecal indicator bacteria in all samples collected for the 8-week study at all sites combined.

|                          | FIB (MPN/100ml) |                |             |
|--------------------------|-----------------|----------------|-------------|
|                          | <i>E. coli</i>  | Total Coliform | Enterococci |
| Number of Samples        | 135             | 135            | 135         |
| Median                   | 41              | 839            | 52          |
| Mean                     | 74              | 1,688          | 75          |
| Standard Deviation       | 192             | 1,920          | 72          |
| Coefficient of Variation | 258%            | 114%           | 96%         |
| 90 Percentile            | 138             | 3,966          | 165         |

**Table S9.** A summary of each location, sample site characteristics and key findings of the 8-week study. Exceedance indicates when the sample exceeded the single sample maximum limits.

| Site ID | Drainage Area & Land Use                                   |  | Key Findings                                                                                                                                       | Potential Source |
|---------|------------------------------------------------------------|--|----------------------------------------------------------------------------------------------------------------------------------------------------|------------------|
| Site 1  | Ocean                                                      |  | <ul style="list-style-type: none"> <li>4/8 Bird Detections (BLOQ)</li> <li>1/8 Ruminant Detections (BLOQ)</li> <li>FIB - No Exceedances</li> </ul> | Bird             |
| Site 2a | -Drainage Area 7                                           |  | <ul style="list-style-type: none"> <li>5/12 Ruminant Detections (BLOQ)</li> </ul>                                                                  | Ruminant         |
|         | -Ocean Site                                                |  | <ul style="list-style-type: none"> <li>Ruminant Detection = 769 Copies/100 mL</li> </ul>                                                           |                  |
|         | -Public land use                                           |  | <ul style="list-style-type: none"> <li>FIB – ENT Exceedance (2/12)</li> </ul>                                                                      |                  |
| Site 3  | -Drainage Area 6                                           |  | <ul style="list-style-type: none"> <li>4/8 Ruminant Detections (BLOQ)</li> </ul>                                                                   | Ruminant         |
|         | -Strawberry Creek                                          |  | <ul style="list-style-type: none"> <li>FIB - ENT Exceedance (3/8)</li> </ul>                                                                       |                  |
|         | -Public land use                                           |  |                                                                                                                                                    |                  |
| Site 4  | -Drainage Area 6                                           |  | <ul style="list-style-type: none"> <li>4/12 Ruminant Detections (BLOQ)</li> </ul>                                                                  | Ruminant         |
|         | -Strawberry Creek                                          |  | <ul style="list-style-type: none"> <li>2/12 Ruminant Detections = 588 &amp; 643 Copies/100 mL</li> </ul>                                           |                  |
|         | -Public land use                                           |  | <ul style="list-style-type: none"> <li>FIB - ENT Exceedance (2/12)</li> </ul>                                                                      |                  |
|         |                                                            |  | <ul style="list-style-type: none"> <li>3/12 Ruminant Detections (BLOQ)</li> </ul>                                                                  |                  |
|         | -Drainage Area 6                                           |  | <ul style="list-style-type: none"> <li>3/12 Dog Detections (BLOQ)</li> </ul>                                                                       | Dog              |
| Site 5  | -Strawberry Creek & Patrick Creek                          |  | <ul style="list-style-type: none"> <li>1/12 Dog Detections = 4,200 Copies/100 mL</li> </ul>                                                        |                  |
|         | -Public land use                                           |  | <ul style="list-style-type: none"> <li>FIB - ENT Exceedance (5/12)</li> </ul>                                                                      |                  |
|         |                                                            |  | <ul style="list-style-type: none"> <li>Collection Event 5 – All FIB Exceeded &amp; 4,200 Copies/100 mL of Dog Detected</li> </ul>                  |                  |
|         | -Drainage Area 6                                           |  | <ul style="list-style-type: none"> <li>4/12 Ruminant Detections (BLOQ)</li> </ul>                                                                  | Ruminant         |
| Site 6  | -Strawberry Creek                                          |  | <ul style="list-style-type: none"> <li>2/12 Ruminant Detections = 1,588 &amp; 2,089 Copies/100 mL</li> </ul>                                       |                  |
|         | -Public & medium density residential land use              |  | <ul style="list-style-type: none"> <li>1/12 Dog Detections (BLOQ)</li> </ul>                                                                       |                  |
|         |                                                            |  | <ul style="list-style-type: none"> <li>FIB - ENT Exceedance (5/12)</li> </ul>                                                                      |                  |
|         | -Drainage Area 6                                           |  | <ul style="list-style-type: none"> <li>4/12 Ruminant Detections (BLOQ)</li> </ul>                                                                  | Ruminant         |
| Site 7  | -Strawberry Creek                                          |  | <ul style="list-style-type: none"> <li>3/12 Ruminant Detections = 710, 750 &amp; 1,192 Copies/100 mL</li> </ul>                                    |                  |
|         | -Public & medium density residential land use              |  | <ul style="list-style-type: none"> <li>1/12 Bird Detections (BLOQ)</li> </ul>                                                                      |                  |
|         |                                                            |  | <ul style="list-style-type: none"> <li>FIB - ENT Exceedance (5/12)</li> </ul>                                                                      |                  |
|         | -Drainage Area 5                                           |  | <ul style="list-style-type: none"> <li>1/12 Human Detections (BLOQ)</li> </ul>                                                                     | Human            |
| Site 8  | -Patrick Creek                                             |  | <ul style="list-style-type: none"> <li>1/12 Human Detections = 591 Copies/100 mL</li> </ul>                                                        |                  |
|         | -Public, agriculture, and low-density residential land use |  | <ul style="list-style-type: none"> <li>1/12 Ruminant Detections (BLOQ)</li> </ul>                                                                  |                  |
|         |                                                            |  | <ul style="list-style-type: none"> <li>FIB - ENT Exceedance (6/12)</li> </ul>                                                                      |                  |
|         | -Drainage Area 4                                           |  |                                                                                                                                                    |                  |
| Site 9  | -Patrick Creek                                             |  | <ul style="list-style-type: none"> <li>MST – No detections</li> </ul>                                                                              | N/A              |
|         | -Agriculture & medium density residential land use         |  | <ul style="list-style-type: none"> <li>FIB - ENT Exceedance (5/12)</li> </ul>                                                                      |                  |
|         | -Drainage Area 3                                           |  |                                                                                                                                                    |                  |
| Site 10 | -Strawberry Creek                                          |  | <ul style="list-style-type: none"> <li>3/8 Ruminant Detections (BLOQ)</li> </ul>                                                                   | Ruminant         |
|         | -Medium density residential                                |  | <ul style="list-style-type: none"> <li>FIB - ENT Exceedance (1/8)</li> </ul>                                                                       |                  |
|         | -Drainage Area 3                                           |  | <ul style="list-style-type: none"> <li>1/12 Human Detections (BLOQ)</li> </ul>                                                                     | Human            |
| Site 11 | -Strawberry Creek                                          |  | <ul style="list-style-type: none"> <li>1/12 Human Detections = 629 Copies /100 mL</li> </ul>                                                       |                  |
|         | -Medium density residential land use                       |  | <ul style="list-style-type: none"> <li>FIB – No Exceedances</li> </ul>                                                                             |                  |
|         | -Drainage Area 2                                           |  | <ul style="list-style-type: none"> <li>2/8 Ruminant Detections (BLOQ)</li> </ul>                                                                   | Ruminant         |
| Site 12 | -Strawberry Creek                                          |  | <ul style="list-style-type: none"> <li>1/12 Ruminant Detections = 1,145 Copies /100 mL</li> </ul>                                                  |                  |
|         | -Agriculture and timberland land use                       |  | <ul style="list-style-type: none"> <li>FIB - ENT Exceedance (2/8)</li> </ul>                                                                       |                  |
|         | -Drainage Area 1                                           |  | <ul style="list-style-type: none"> <li>1/8 Ruminant Detections (BLOQ)</li> </ul>                                                                   | N/A              |
| Site 13 | Rose Creek                                                 |  | <ul style="list-style-type: none"> <li>FIB - ENT Exceedance (2/8)</li> </ul>                                                                       |                  |
|         | Agriculture land use                                       |  | <ul style="list-style-type: none"> <li>FIB – TC Exceedance (1/8)</li> </ul>                                                                        |                  |



**Table S10.** Summary of master mix components and performance characteristics of each MST assay that includes Limit of Detection (LOD), Limit of Quantification (LOQ) and LOQ per 100 mLs of water filtered.

|                            | <b>HF183</b>         | <b>Rum2Bac</b>       | <b>DogBact</b>       | <b>Lee Seagull</b>   |
|----------------------------|----------------------|----------------------|----------------------|----------------------|
| 2x Master Mix              | 12.5 µl              | 12.5 µl              | 12.5 µl              | 10 µl                |
| BSA                        | 2.5 µl               | 2.5 µl               | 2.5 µl               | 2 µl                 |
| PCR Grade H <sub>2</sub> O | 3.5 µl               | 4.5 µl               | 7.4 µl               | 1.43 µl              |
| Primer/Probe Mix           | 3.5 µl               | 3.5 µl               | N/A                  | N/A                  |
| Forward/Reverse Primer     | N/A                  | N/A                  | 0.225 µl / 0.225 µl  | 0.63 µl / 0.63 µl    |
| Probe                      | N/A                  | N/A                  | 0.15 µl              | 0.31 µl              |
| IAC Plasmid (500 copies)   | 1.0 µl               | N/A                  | N/A                  | N/A                  |
| Total MM Volume            | 23 µl                | 23 µl                | 23 µl                | 15 µl                |
| DNA Template               | 2 µl                 | 2 µl                 | 2 µl                 | 5 µl                 |
| Final Volume               | 25 µl                | 25 µl                | 25 µl                | 20 µl                |
| LOD                        | 1 copy               | 1 copy               | 1 copy               | 1 copy               |
| LOQ                        | 10 copies / Reaction |
| LOQ/100 mls                | 500 copies           | 500 copies           | 500 copies           | 200 copies           |
